# Supplementary material for: Genome characterization and comparative analysis among three swimming crab species
Source: Frontiers journal article supplement (doi:10.3389/fmars.2022.895119), 2022-07-27
Supplement: Data_Sheet_1.zip [file Data_Sheet_1.zip]

Table S1 Statistics of microsatellite loci for the three crab species

| **Species** | **Total microsatellite**  **motif number** | **Dinucleotide**  **repeat** | **Trinucleotide**  **repeat** | **Tetranucleotide**  **repeat** | **Pentanucleotide**  **repeat** | **Hexanucleotide**  **repeat** | | **Unique**  **markers** | |
| --- | --- | --- | --- | --- | --- | --- | --- | --- | --- |
| ***P. trituberculatus*** | 1,300,481 | 753,456 | 464,825 | 59,737 | 16,832 | 5,631 | 727,840 | |
| ***C. japonica*** | 986,118 | 586,483 | 322,206 | 64,377 | 8,415 | 4,637 | 575,000 | |
| ***C. sapidus*** | 1,681,505 | 992,248 | 575,188 | 85,414 | 23,577 | 5,078 | 932,123 | |
